# Supplementary material
Source: PubMed Central journal article supplement (PMC2569827)

HIGH-YIELD ACTIVATION OF SCAFFOLD POLYMER SURFACES  
TO ATTACH CELL ADHESION MOLECULES

T. Joseph Dennes,<sup>1</sup> Geoffrey C. Hunt,<sup>2</sup> Jean E. Schwarzbauer,<sup>2</sup> and

Jeffrey Schwartz<sup>1,\*</sup>

<sup>1</sup>*Department of Chemistry, Princeton University, Princeton, NJ 08544*

<sup>2</sup>*Department of Molecular Biology, Princeton University, Princeton, NJ 08544*

E-mail: [jschwartz@princeton.edu](mailto:jschwartz@princeton.edu)

**Supporting Information**

Fluorescence intensity vs. time traces for a 2 cm<sup>2</sup> sample of **9** and a 4 cm<sup>2</sup> sample of **7**:  
hydrolysis of DANSYL-Cys from **9b** measured for a film of area 2 cm<sup>2</sup> and hydrolysis of  
DANSYL-Cys from **7b** measured for a film of area 4 cm<sup>2</sup>.

Fluorescence intensity vs. time traces for a 2 cm<sup>2</sup> sample of **9** and a 4 cm<sup>2</sup> sample of **7** are shown below. Both traces are normalized with data from a control film of **3** that was soaked in DANSYL-Cys for 24 hrs.

Hydrolysis of DANSYL-Cys from **9b** measured for a film of area 2 cm<sup>2</sup>. No increase in dissolved fluorescent material was observed at pH 7.5 after initial removal of physisorbed material. The amount of DANSYL-Cys released at pH 12 is a measure of material that remains surface bound at pH 7.5 (0.18 nmol/cm<sup>2</sup>).

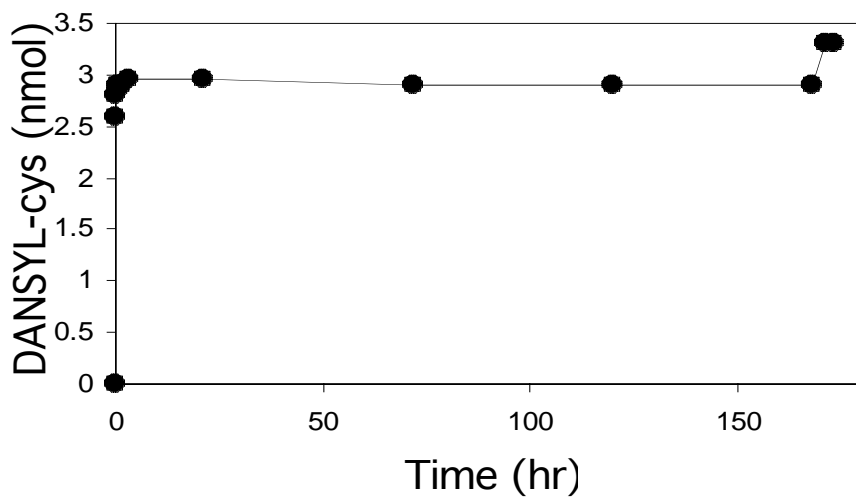

Hydrolysis of DANSYL-Cys from **7b** measured for a film of area  $4 \text{ cm}^2$ . No increase in dissolved fluorescent material was observed at pH 7.5 after initial removal of physisorbed material. The amount of DANSYL-Cys released at pH 12 is a measure of material that remains surface bound at pH 7.5 ( $0.10 \text{ nmol/cm}^2$ ).

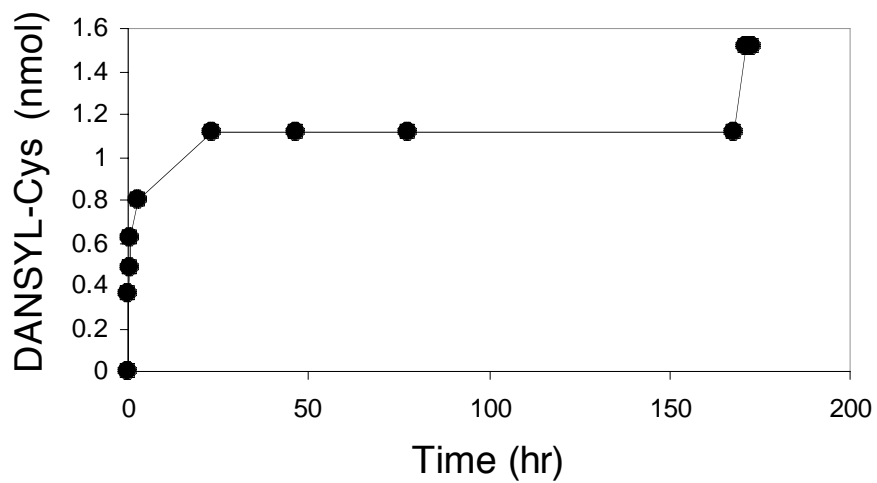

Supplement: NIHMS61762-supplement-si20061106_051.pdf [file NIHMS61762-supplement-si20061106_051.pdf]
